# Supplementary material for: Fanconi Anemia complementation group C protein in metabolic disorders
Source: publisher site journal article supplement (doi:10.18632/aging.101487), 2018-06-21
Supplement: Supplementary file [file aging-v10i6-101487-supplementary-material-SD1.pdf]

**SUPPLEMENTARY MATERIAL**

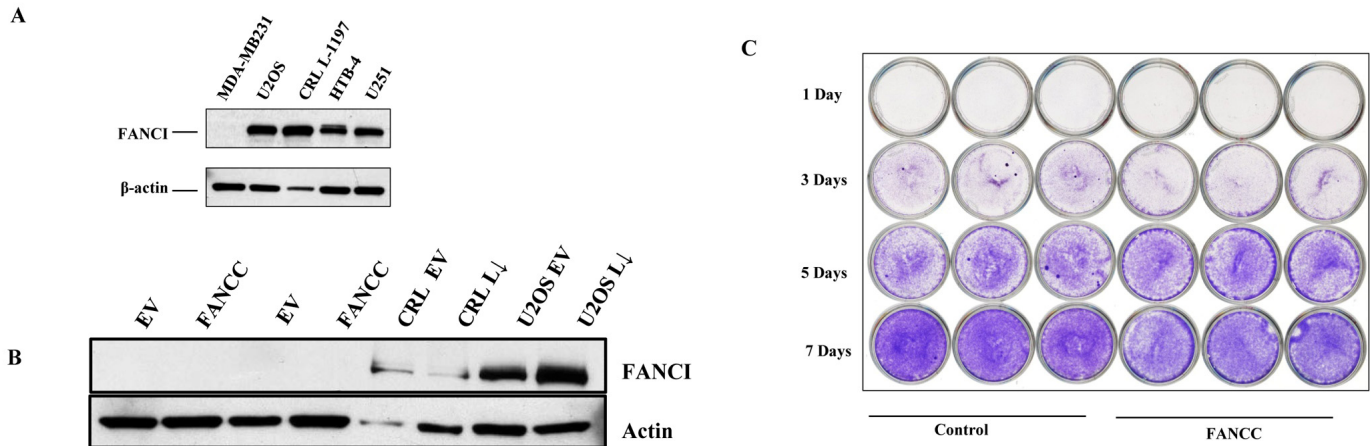

**Supplementary Figure 1.** (A,B) The FANCI expression is undetectable in MDA-MB231 cells. Additional western blotting showed that FANCI is not detectable in the parental cells (A) as well in derivatives (transfected with empty Vectors for control or FANCC cDNA containing plasmids) (B). (C) Cells containing FANCC cDNA grow slowly. Determination of the cell proliferation of FANCC-high versus low cells. A total of 2000 cells of FANCC-high or low cells were plated in triplicates and stained with crystal violet at the day 1, 3, 5 or 7. FANCC-high cells clearly have a lower density compared to the corresponding FANCC-low cells.

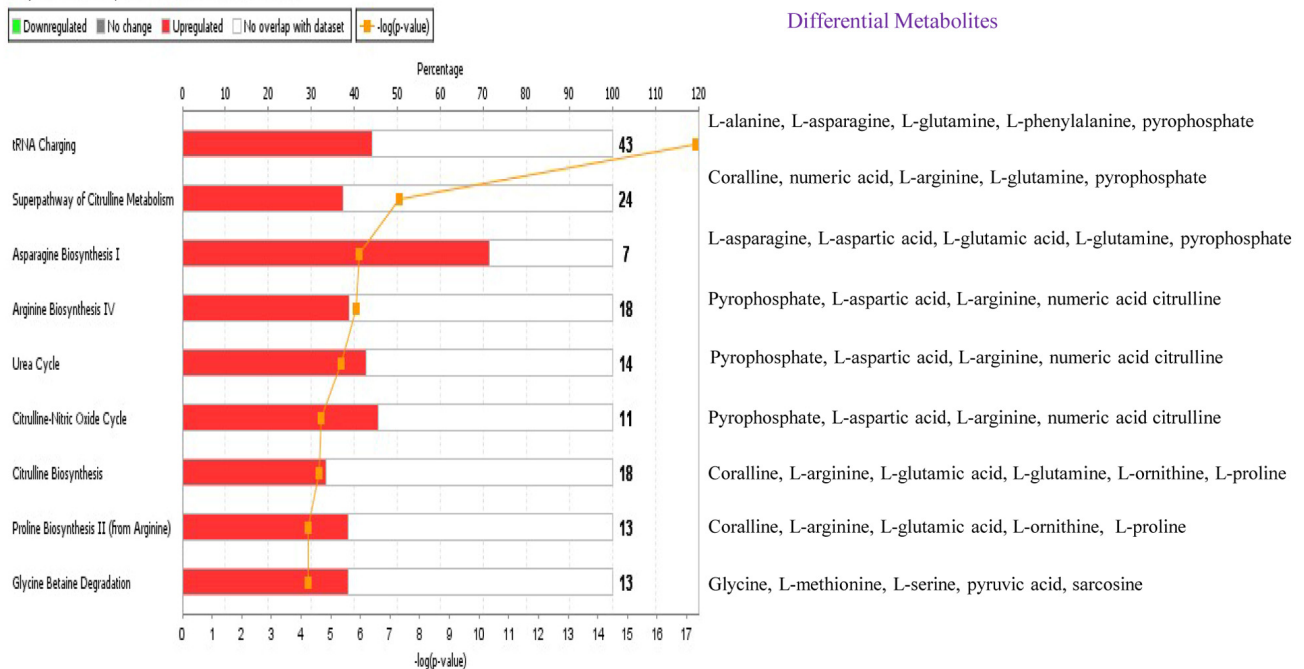

**Supplementary Figure 2.** Altered basic cellular processes in FANCC-high cells compared to FANCC-low cells. Analysis of molecular processes on the basis of metabolites present in FANCC-high or Low cells. Most significantly altered basic molecular processes and their metabolites revealed by IPA displayed. A total number of signature metabolites for each process were listed at the side.

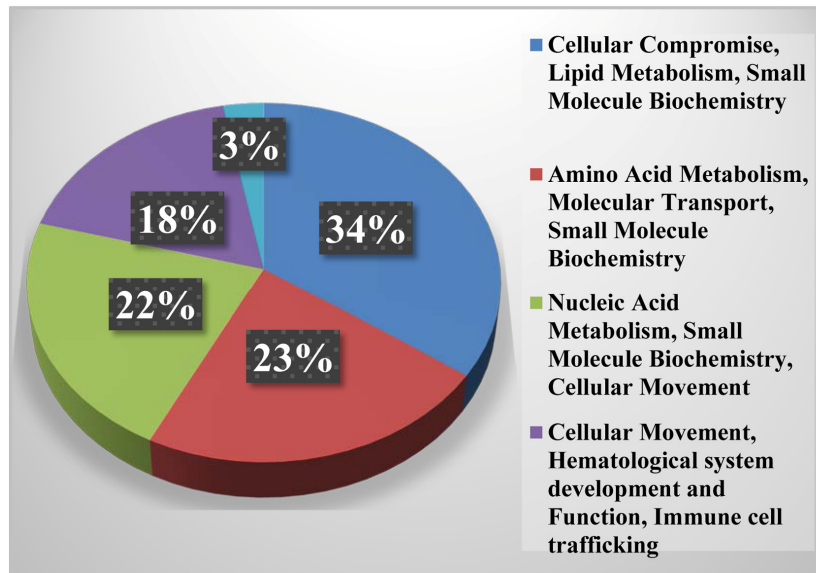

Supplementary Figure 3. Categories of altered 205 metabolites.

Supplementary Table 1. Summary of metabolomics analysis.

| Canonical Pathway                              | p-Value                                       | Overlap       |
|------------------------------------------------|-----------------------------------------------|---------------|
| tRNA Charging                                  | $5.1 \times 10^{-18}$                         | 44.2% (19/43) |
| Superpathway of Citrulline Metabolism          | $4.9 \times 10^{-08}$                         | 37.5% (9/24)  |
| Arginine Biosynthesis IV                       | $1.3 \times 10^{-6}$                          | 71.4% (5/7)   |
| Asparagine Biosynthesis                        | $1.8 \times 10^{-6}$                          | 38.9% (7/18)  |
| Urea Cycle                                     | $4.33 \times 10^{-6}$                         | 42.9% (6/14)  |
| Diseases and Bio Functions                     | p-Value                                       | Metabolites   |
| Cancer                                         | $4.39 \times 10^{-02} - 5.93 \times 10^{-14}$ | 30            |
| Connective tissue Disorders                    | $3.67 \times 10^{-02} - 3.39 \times 10^{-07}$ | 15            |
| Gastrointestinal Disease                       | $4.93 \times 10^{-02} - 5.93 \times 10^{-14}$ | 28            |
| Inflammatory Disease                           | $3.67 \times 10^{-02} - 3.39 \times 10^{-07}$ | 7             |
| Organismal injury and Abnormalities            | $4.42 \times 10^{-02} - 5.9 \times 10^{-07}$  | 36            |
| Molecular and Cellular Functions               | p-Value                                       | Metabolites   |
| Cellular growth and Proliferation              | $4.93 \times 10^{-02} - 5.93 \times 10^{-14}$ | 30            |
| Amino Acid metabolism                          | $3.89 \times 10^{-02} - 2.43 \times 10^{-10}$ | 21            |
| Molecular Transport                            | $4.93 \times 10^{-02} - 2.43 \times 10^{-10}$ | 33            |
| Small Molecule Biochemistry                    | $4.93 \times 10^{-02} - 2.43 \times 10^{-10}$ | 36            |
| Cell Cycle                                     | $4.93 \times 10^{-02} - 2.43 \times 10^{-10}$ | 13            |
| Physiological System Development and Functions | p-Value                                       | Metabolites   |
| Organism Development                           | $3.36 \times 10^{-02} - 8.20 \times 10^{-10}$ | 22            |
| Hepatic system Development and Function        | $3.67 \times 10^{-02} - 5.85 \times 10^{-11}$ | 11            |
| Nervous System Development and Function        | $4.93 \times 10^{-02} - 2.13 \times 10^{-05}$ | 15            |
| Organismal Survival                            | $8.14 \times 10^{-04} - 8.14 \times 10^{-04}$ | 13            |
| Tissue Morphology                              | $4.04 \times 10^{-02} - 7.57 \times 10^{-03}$ | 8             |

| <b>Toxicology Functions</b>              |                                               |                    |
|------------------------------------------|-----------------------------------------------|--------------------|
| <b>Clinical Chemistry and Hematology</b> | <b>p-Value</b>                                | <b>Metabolites</b> |
| Increased Levels of albumin              | $8.20 \times 10^{-10} - 2.80 \times 10^{-10}$ | 8                  |
| Increase Levels of LDH                   | $1.92 \times 10^{-01} - 1.39 \times 10^{-01}$ | 3                  |
| Increase Levels of Alkaline Phosphatase  | $1.32 \times 10^{-03} - 1.32 \times 10^{-03}$ | 2                  |
| Increase Levels of Creatinine            | $1.32 \times 10^{-03} - 1.32 \times 10^{-03}$ | 2                  |
| <b>Cardiotoxicity</b>                    | <b>p-Value</b>                                | <b>Metabolites</b> |
| Cardiac Damage                           | $1.06 \times 10^{-01} - 1.06 \times 10^{-01}$ | 1                  |
| Cardiac Degeneration                     | $1.06 \times 10^{-01} - 1.06 \times 10^{-01}$ | 1                  |
| Bradycardia                              | $1.71 \times 10^{-01} - 1.71 \times 10^{-01}$ | 1                  |
| Congenital Heart Anomaly                 | $1.39 \times 10^{-01} - 1.39 \times 10^{-01}$ | 1                  |
| Cardiac Necrosis/Cell Death              | $1.39 \times 10^{-01} - 1.39 \times 10^{-01}$ | 2                  |
| <b>Hepatotoxicity</b>                    | <b>p-Value</b>                                | <b>Metabolites</b> |
| Liver Necrosis/Cell Death                | $7.34 \times 10^{-01} - 4.38 \times 10^{-03}$ | 6                  |
| Liver Steatosis                          | $2.31 \times 10^{-01} - 2.96 \times 10^{-04}$ | 7                  |
| Hepatocellular Carcinoma                 | $3.29 \times 10^{-06} - 3.29 \times 10^{-06}$ | 8                  |
| Liver Hyperplasia/Hyperproliferation     | $3.29 \times 10^{-06} - 3.29 \times 10^{-06}$ | 8                  |
| Liver Inflammation/Hepatitis             | $3.03 \times 10^{-01} - 3.67 \times 10^{-02}$ | 3                  |
| <b>Nephrotoxicity</b>                    | <b>p-Value</b>                                | <b>Metabolites</b> |
| Kidney Failure                           | $2.33 \times 10^{-01} - 3.67 \times 10^{-02}$ | 2                  |
| Renal Necrosis/Cell Death                | $1.06 \times 10^{-01} - 3.67 \times 10^{-02}$ | 5                  |
| Glomerular Injury                        | $1.06 \times 10^{-01} - 1.06 \times 10^{-01}$ | 1                  |
| Nephrosis                                | $1.06 \times 10^{-01} - 1.06 \times 10^{-01}$ | 1                  |
| Renal Fibrosis                           | $1.06 \times 10^{-01} - 1.06 \times 10^{-01}$ | 1                  |

**Supplementary Table 2. Top analysis-ready molecules.**

| <b>Experimental Fold Change up-regulated / down-regulated Molecules</b> |                    |
|-------------------------------------------------------------------------|--------------------|
| <b>Metabolites</b>                                                      | <b>Fold Change</b> |
| Inosine                                                                 | ↑ 20.990           |
| Hypoxanthine                                                            | ↑ 12.640           |
| Pyrophosphate                                                           | ↑ 8.310            |
| L-asparagine                                                            | ↑ 7.240            |
| L-phenylalanine                                                         | ↑ 7.130            |
| Acetyl-L-carnitine                                                      | ↑ 6.550            |
| Beta-alanine                                                            | ↑ 6.300            |
| Glutaryl-carnitine                                                      | ↑ 6.110            |
| Niacinamide                                                             | ↑ 6.030            |
| Creatinine                                                              | ↑ 5.910            |
| 14:0/22:0 phosphatidylcholine                                           | ↓ -8.400           |
| 22:1(13Z)/20:3(5Z,8Z,11Z) phosphatidylcholine                           | ↓ -5.880           |
| 18:0/24:1(15Z) phosphatidylcholine                                      | ↓ -5.610           |
| 20:0/22:2(13Z,16Z) phosphatidylcholine                                  | ↓ -5.590           |
| 20:0/20:2(11Z,14Z) phosphatidylcholine                                  | ↓ -5.530           |
| 20:0/22:5(7Z,10Z,13Z,16Z,19Z) phosphatidylcholine                       | ↓ -5.380           |
| 16:0/24:1(15Z) phosphatidylcholine                                      | ↓ -5.320           |
| 20:0/22:6(4Z,7Z,10Z,13Z,16Z,19Z) phosphatidylcholine                    | ↓ -4.910           |
| 18:3(9Z,12Z,15Z)/22:0 phosphatidylcholine                               | ↓ -4.700           |
| dm18:0/18:1(9Z) phosphatidylcholine                                     | ↓ -4.680           |

**Supplementary Table 3. Top networks of the metabolites.**

| <b>ID</b> | <b>Associated Network Functions</b>                                                          | <b>Score</b> |
|-----------|----------------------------------------------------------------------------------------------|--------------|
| 1         | Cellular Compromise, Lipid Metabolism, Small Molecule Biochemistry                           | 35           |
| 2         | Amino Acid Metabolism, Molecular Transport, Small Molecule Biochemistry                      | 23           |
| 3         | Nucleic Acid Metabolism, Small Molecule Biochemistry, Cellular Movement                      | 22           |
| 4         | Cellular Movement, Hematological system development and Function, Immune cell trafficking    | 18           |
| 5         | Cellular Growth and Proliferation, Organism Development, Organismal Injury and Abnormalities | 3            |
